# Supplementary material for: In situ monitoring drying process to disclose the correlation between the molecular weights of a polymer acceptor with a flexible spacer and the performance of all-polymer solar cells
Source: Royal Society of Chemistry journal article supplement (doi:10.1039/d4tc02217c), 2024-01-01
Supplement: d4tc02217c1.pdf [file d4tc02217c1.pdf]

## In situ monitoring drying process to disclose the correlation between molecular weights of polymer acceptor with flexible spacer and performance of all-polymer solar cells

Jiale Xiang,<sup>a,b</sup> Sven Englund,<sup>a</sup> Zewdneh Genene,<sup>c</sup> Guanzhao Wen,<sup>d</sup> Yanfeng Liu,<sup>\*a,e</sup> Nannan Yao,<sup>a,f</sup> Rui Zhang,<sup>a</sup> Leiqiang Qin,<sup>a</sup> Lei Wang,<sup>a</sup> Ergang Wang,<sup>\*c</sup> Wei Zhang,<sup>\*d</sup> Fengling Zhang<sup>\*a, b</sup>

### 1. Supporting Figures

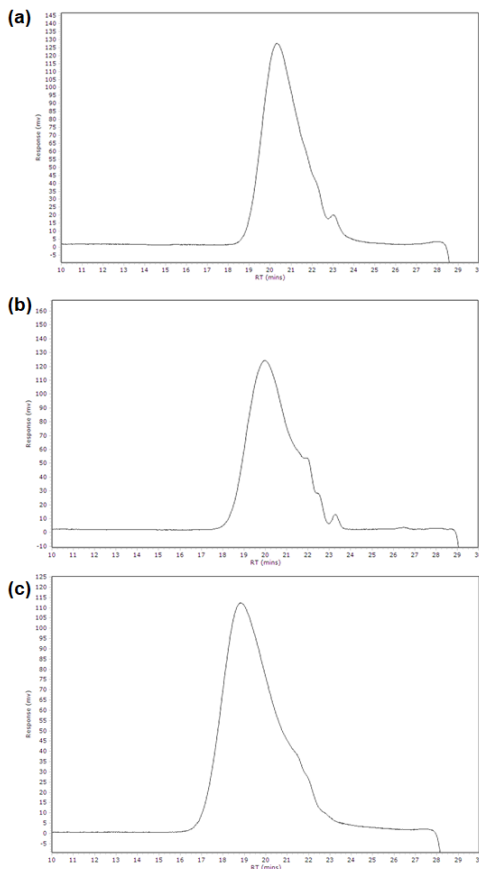

Figure S1. GPC profiles of PYTS samples with different molecular weight, (a) PYTS<sub>L</sub>, (b) PYTS<sub>M</sub> and (c) PYTS<sub>H</sub>.

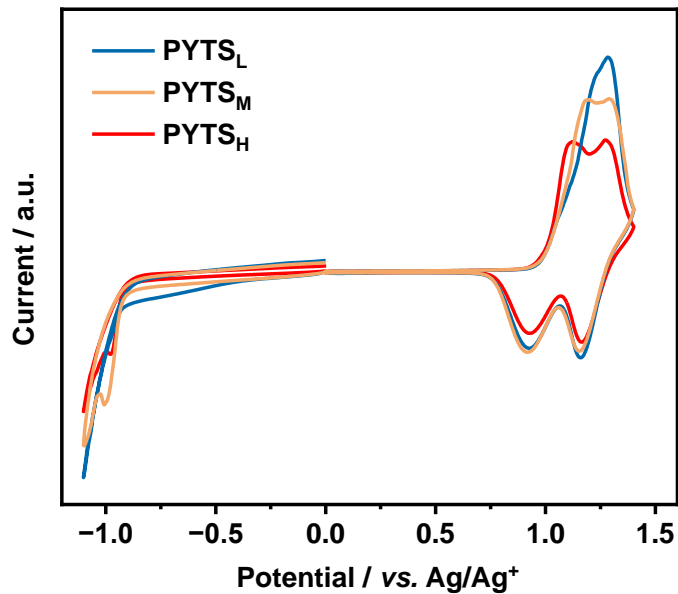

Figure S2. Cyclic voltammogram for reduction of PYTS thin film of different molecular weights.

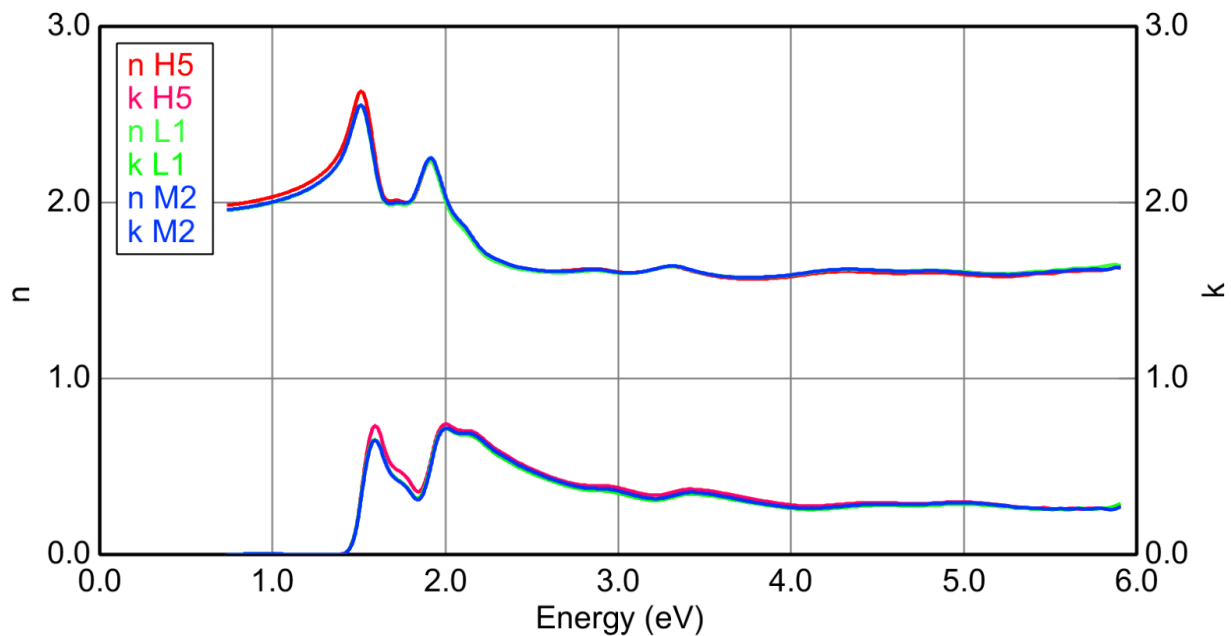

Figure S3.  $n$ ,  $k$  values of PYTS with different  $M_n$ . L1 represents PYTS<sub>L</sub>, M2 represents PYTS<sub>M</sub>, H5 represents PYTS<sub>H</sub>.

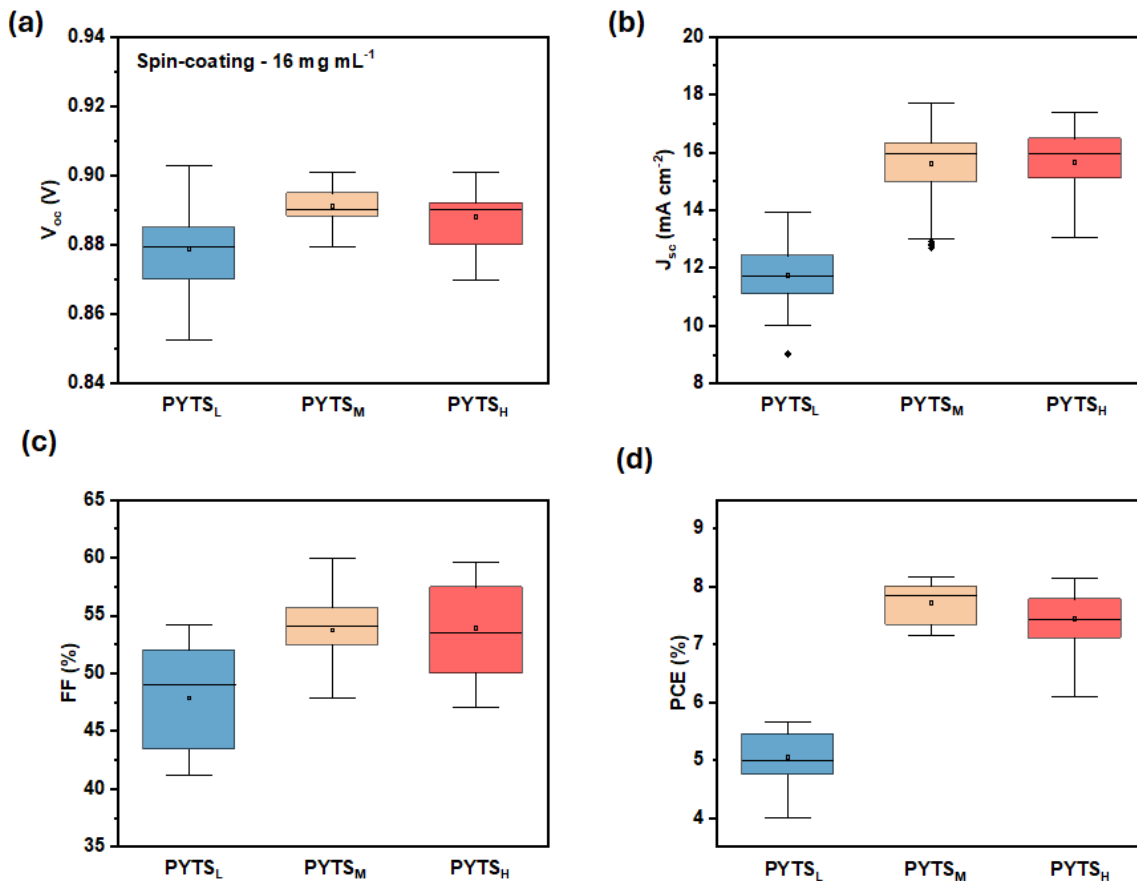

Figure S4. The relationships of photovoltaic parameters ( $V_{oc}$ ,  $J_{sc}$ ,  $FF$ , and  $PCE$ ) with the  $M_n$  of acceptor polymer PYTS in PBDB-T:PYTS all-PSC devices with concentration of  $16 \text{ mg mL}^{-1}$  via spin-coating: (a)  $V_{oc}$ , (b)  $J_{sc}$ , (c)  $FF$ , and (d)  $PCE$ . The error bars were generated from over 24 devices at each  $M_n$ .

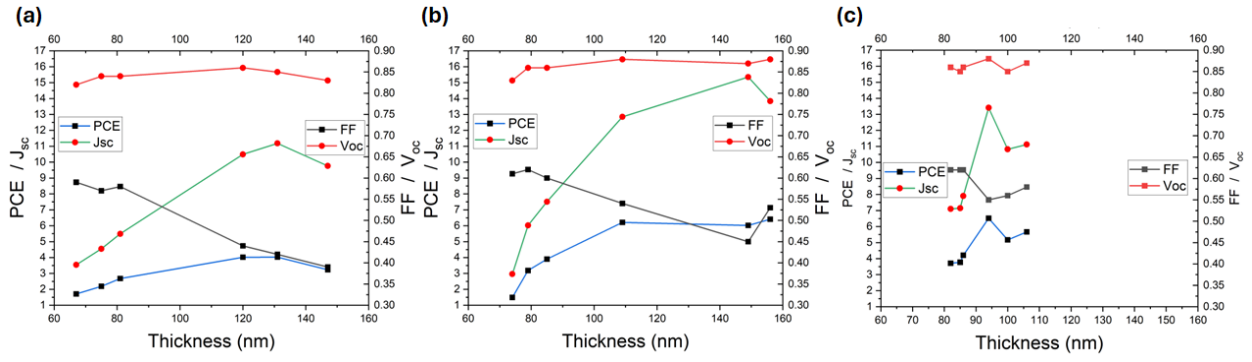

Figure S5. The relationships of photovoltaic parameters ( $V_{oc}$ ,  $J_{sc}$ ,  $FF$ , and  $PCE$ ) with the thickness of active layer in PBDB-T:PYTS all-PSC devices via blade-coating: (a) PYTS<sub>L</sub>, (b) PYTS<sub>M</sub>, and (c) PYTS<sub>H</sub>.

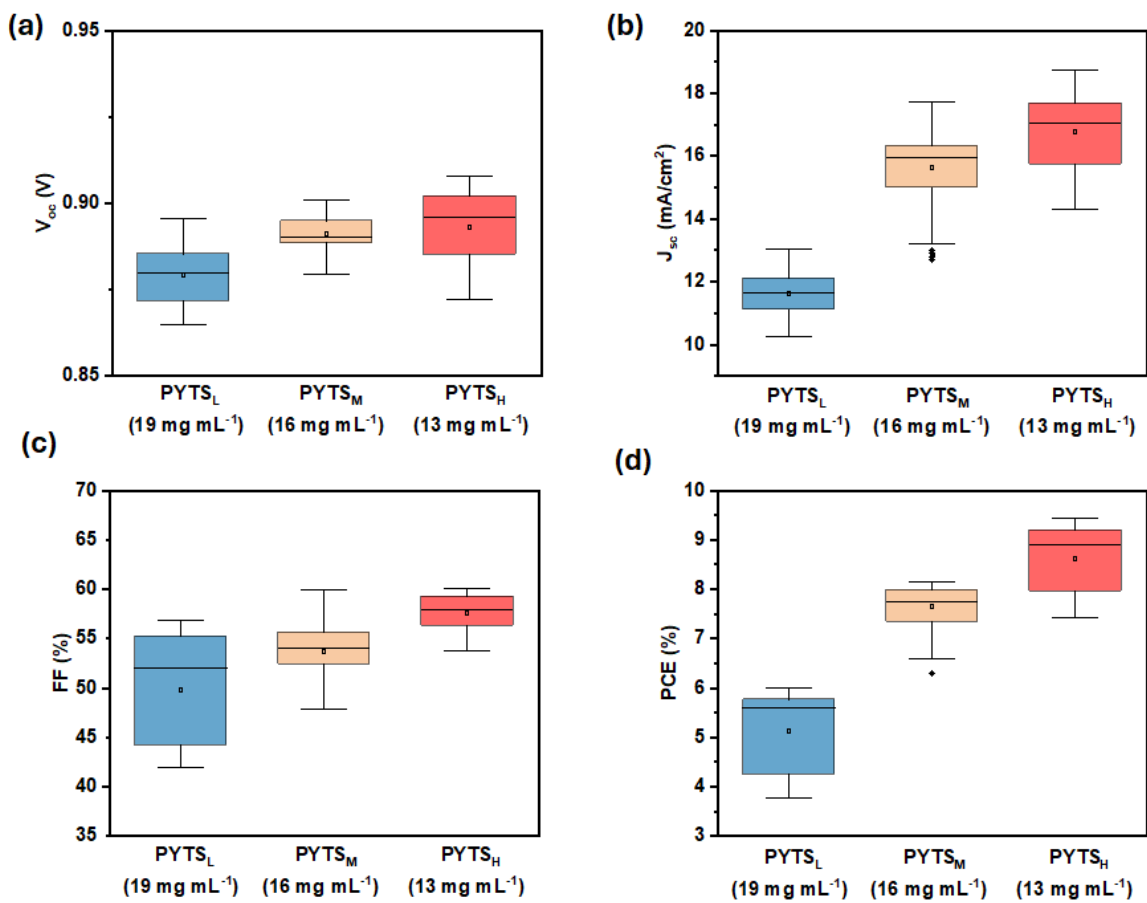

Figure S6. The relationships of photovoltaic parameters ( $V_{oc}$ ,  $J_{sc}$ ,  $FF$ , and  $PCE$ ) with the  $M_n$  of acceptor polymer PYTS in PBDB-T:PYTS all-PSC devices with different concentration via spin-coating: (a)  $V_{oc}$ , (b)  $J_{sc}$ , (c)  $FF$ , and (d)  $PCE$ . The error bars were generated from over 24 devices at each  $M_n$ .

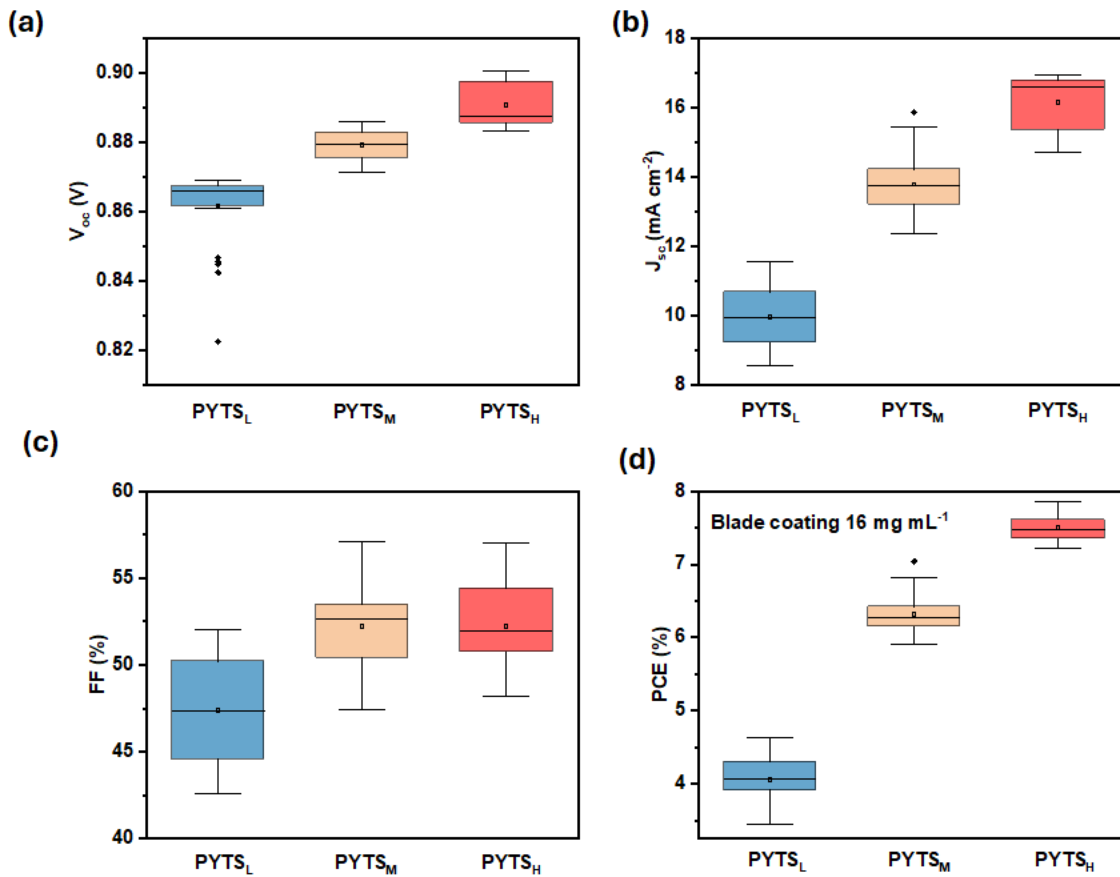

Figure S7. The relationships of photovoltaic parameters ( $V_{oc}$ ,  $J_{sc}$ ,  $FF$ , and  $PCE$ ) with the  $M_n$  of acceptor polymer PYTS in PBDB-T:PYTS all-PSC devices with concentration of  $16\ mg\ mL^{-1}$  via blade-coating: (a)  $V_{oc}$ , (b)  $J_{sc}$ , (c)  $FF$ , and (d)  $PCE$ . The error bars were generated from over 24 devices at each  $M_n$ .

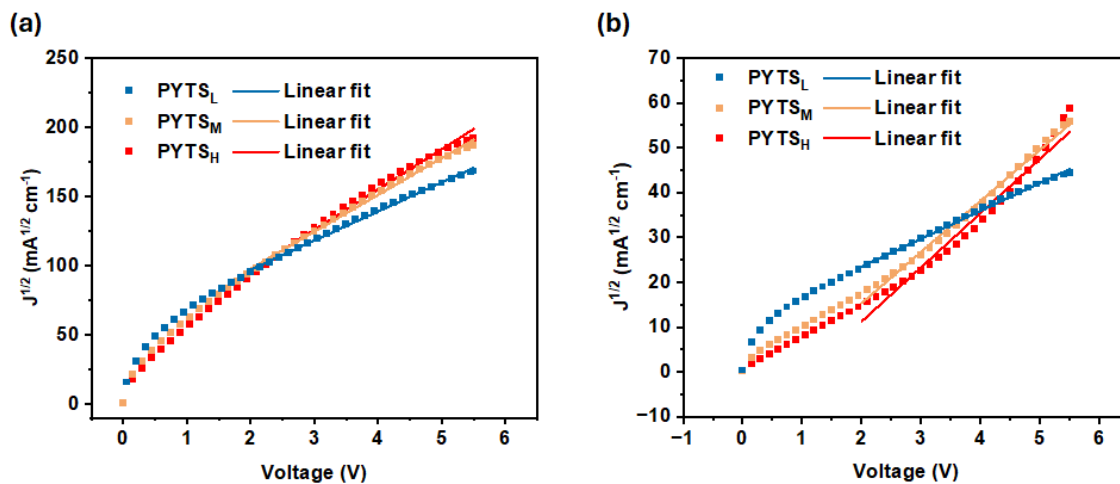

Figure S8.  $J^{0.5}$ -V curves of the (a) hole-only and (b) electron-only devices derived from SCLC.

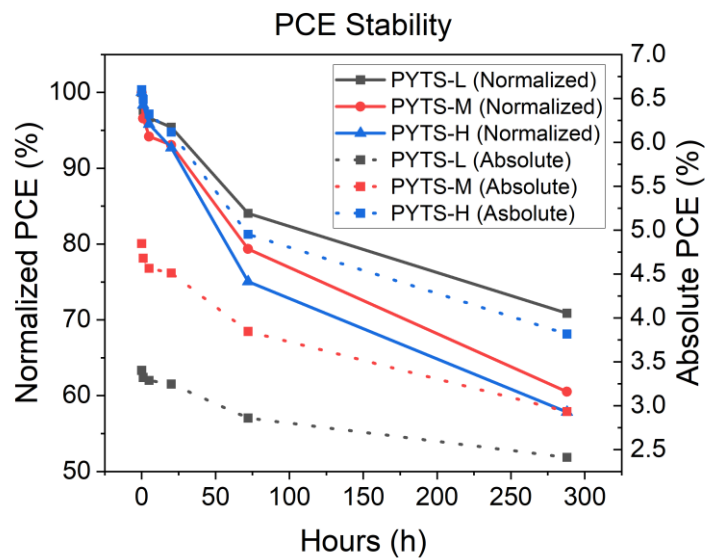

Figure S9. Storage stability of all-PSCs with different  $M_n$ , devices were stored in ambient air after encapsulation.



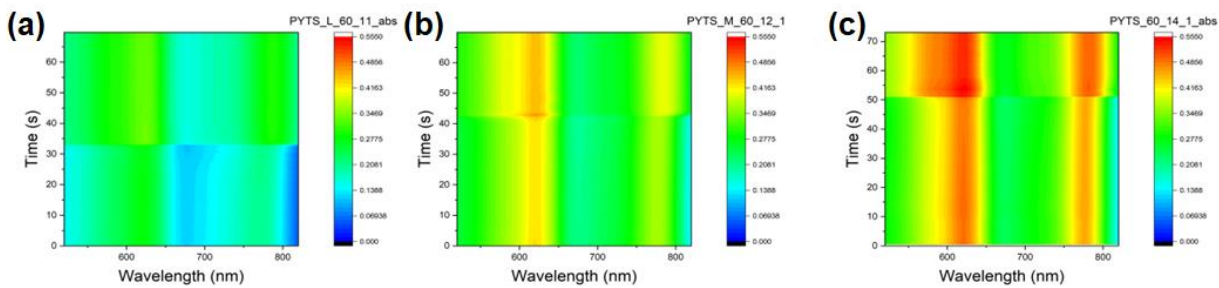

Figure S10. Time-dependent contour maps of UV-vis absorption spectra measured on different blends. (a) PBDB-T:PYTS<sub>L</sub>, (b) PBDB-T:PYTS<sub>M</sub>, and (c) PBDB-T:PYTS<sub>H</sub>.

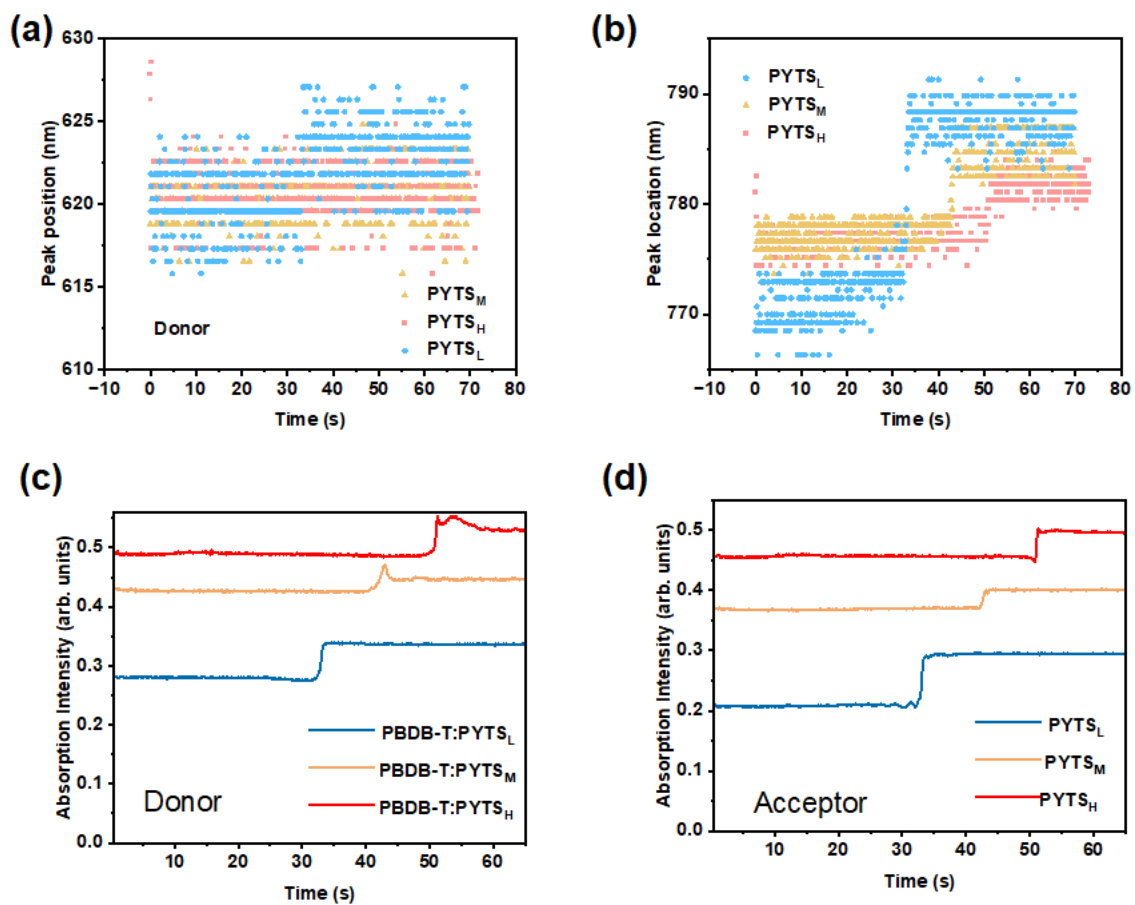

Figure S11. Plots of spectral evolution probed at the (a) donor and (b) acceptor absorption peaks based on the results in time-dependent contour maps.

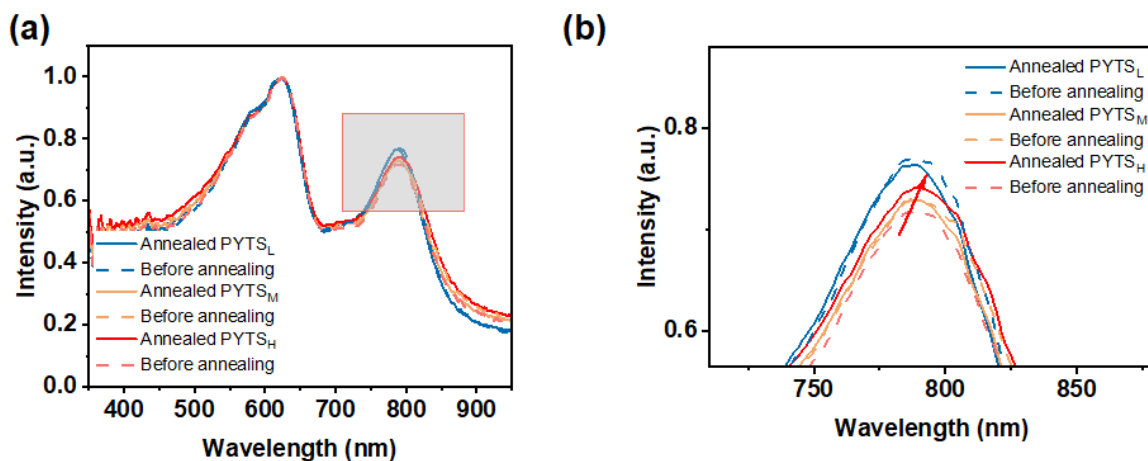

Figure S12. (a) Thin-film optical absorption spectra of the PBDB-T:PYTS acceptor copolymer at different number-average molecular weights  $M_n$  before and after heat annealing. (b) The enlarged view of the gray area in (a).

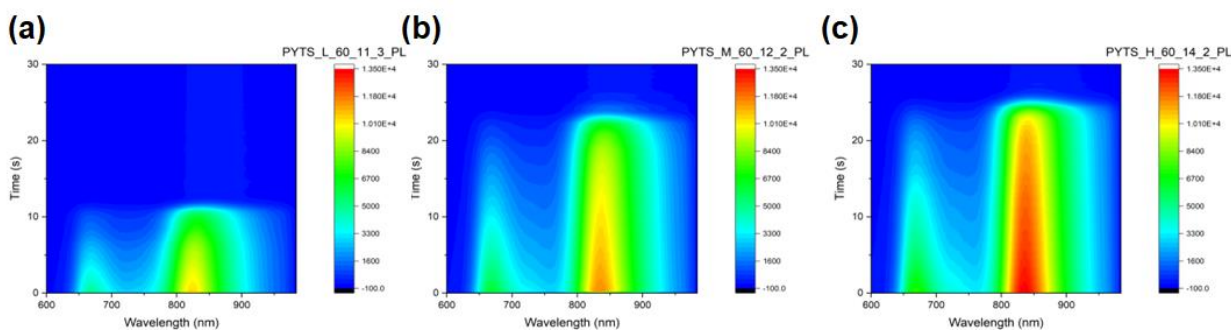

Figure S13. Time-dependent contour maps of PL spectra measured on different blends. (a) PBDB-T:PYTS<sub>L</sub>, (b) PBDB-T:PYTS<sub>M</sub>, and (c) PBDB-T:PYTS<sub>H</sub>.

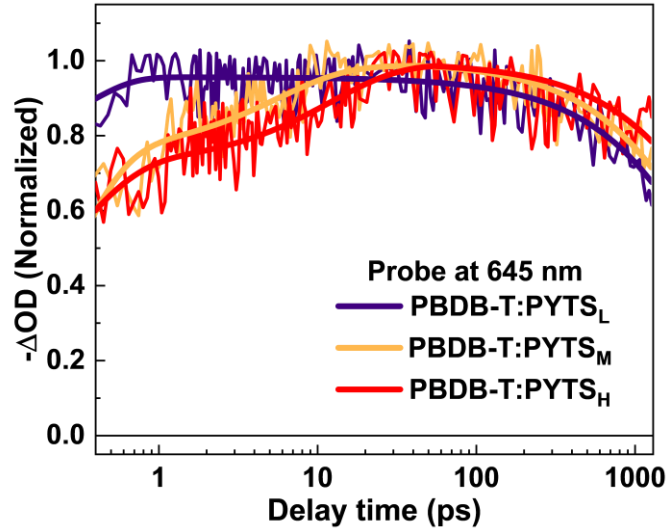

Figure S14. The extracted TA kinetics of  $\sim 645$  nm of three blend films after excitation at 800 nm with an excitation fluence of  $3.6 \times 10^{13}$  photons $\cdot$ cm $^{-2}$  $\cdot$ pulse $^{-1}$ .

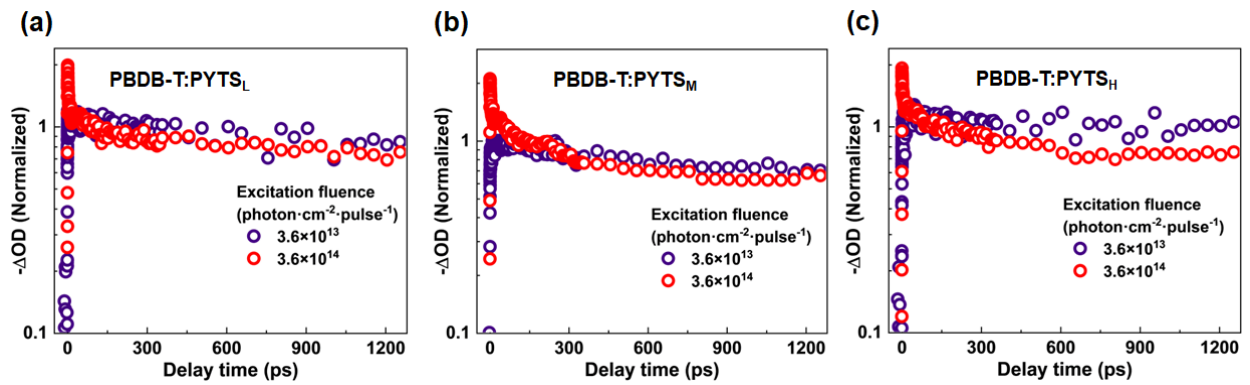

Figure S15. The extracted TA kinetics of  $\sim 645$  nm of three blend films after excitation at 800 nm with various excitation fluencies. The TA kinetics normalized at  $\sim 30$  ps.

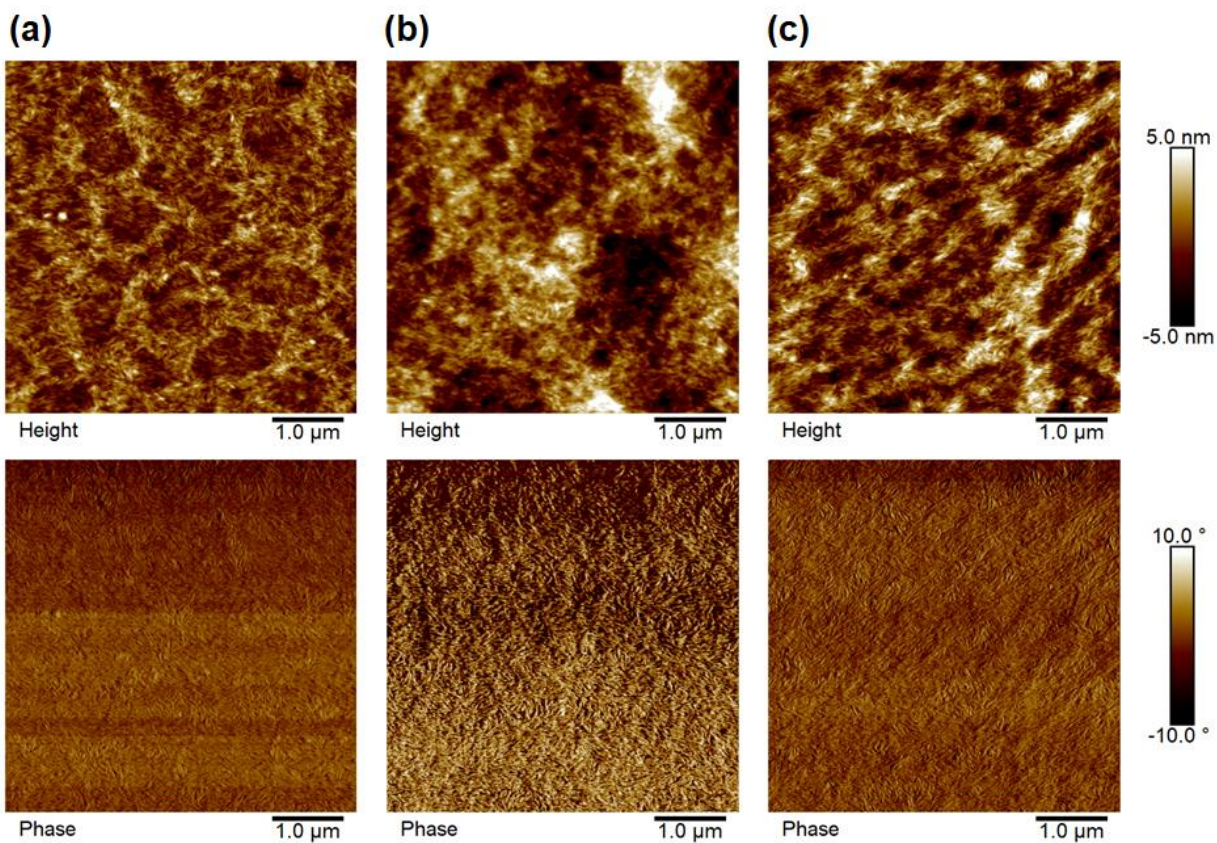

Figure S16. AFM height and phase images. (a) PBDB-T:PYTS<sub>L</sub>, (b) PBDB-T:PYTS<sub>M</sub>, and (c) PBDB-T:PYTS<sub>H</sub>.

## 2. Supporting Tables

Table S1. PV performances of the all-PSCs depending on the Mn of P<sub>As</sub> with concentration of 16 mg mL<sup>-1</sup> via spin-coating.

|                          | $V_{oc}$<br>(V)     | $J_{sc}$<br>(mA cm <sup>-2</sup> ) | $FF(\%)$              | $PCE (\%)$          |
|--------------------------|---------------------|------------------------------------|-----------------------|---------------------|
| PBDB-T:PYTS <sub>L</sub> | 0.88<br>(0.88±0.01) | 12.80<br>(11.74±0.93)              | 50.13<br>(47.86±4.33) | 5.67<br>(5.05±0.39) |
| PBDB-T:PYTS <sub>M</sub> | 0.90<br>(0.89±0.01) | 16.21<br>(15.61±1.17)              | 55.93<br>(53.73±2.45) | 8.16<br>(7.71±0.33) |
| PBDB-T:PYTS <sub>H</sub> | 0.89<br>(0.89±0.01) | 17.35<br>(15.68±1.05)              | 52.70<br>(53.89±3.62) | 8.14<br>(7.44±0.46) |

Table S2. PV performances of the all-PSCs depending on the Mn of P<sub>As</sub> with concentration of 16 mg mL<sup>-1</sup> via blade-coating.

|                          | $V_{oc}$<br>(V)     | $J_{sc}$<br>(mA cm <sup>-2</sup> ) | $FF(\%)$              | $PCE (\%)$          |
|--------------------------|---------------------|------------------------------------|-----------------------|---------------------|
| PBDB-T:PYTS <sub>L</sub> | 0.87<br>(0.86±0.01) | 11.27<br>(9.96±0.86)               | 47.35<br>(47.40±3.06) | 4.62<br>(4.05±0.29) |
| PBDB-T:PYTS <sub>M</sub> | 0.88<br>(0.88±0.00) | 15.43<br>(13.78±0.81)              | 51.90<br>(52.23±2.38) | 7.04<br>(6.32±0.24) |
| PBDB-T:PYTS <sub>H</sub> | 0.90<br>(0.89±0.01) | 16.89<br>(16.16±0.72)              | 51.76<br>(52.19±2.43) | 7.85<br>(7.50±0.18) |

Table S3. The detailed fitting parameters of the rising process in ~645 nm for three blend films after excitation at 800 nm.

| Active layer             | $A_1$ | $\tau_1$ (ps) | $A_2$ | $\tau_2$ (ps) |
|--------------------------|-------|---------------|-------|---------------|
| PBDB-T:PYTS <sub>L</sub> | /     | /             | /     | /             |
| PBDB-T:PYTS <sub>M</sub> | 0.76  | 0.21          | 0.23  | 5.70          |
| PBDB-T:PYTS <sub>H</sub> | 0.71  | 0.27          | 0.27  | 12.32         |

Table S4. The detailed fitting parameters of charge recombination process for three blend films after excitation at 800 nm and probe at ~645 nm.

| Active layer             | A    | $\tau$ (ps) |
|--------------------------|------|-------------|
| PBDB-T:PYTS <sub>L</sub> | 0.96 | 3756.89     |
| PBDB-T:PYTS <sub>M</sub> | 0.99 | 3884.01     |
| PBDB-T:PYTS <sub>H</sub> | 0.99 | 5450.44     |

Table S5. Detailed data of GIWAXS Characterization.

|                          | (100)                          |                           |                           |                      | (010)                          |                            |                           |                      |
|--------------------------|--------------------------------|---------------------------|---------------------------|----------------------|--------------------------------|----------------------------|---------------------------|----------------------|
|                          | Position ( $\text{\AA}^{-1}$ ) | FWHM( $\text{\AA}^{-1}$ ) | Distance ( $\text{\AA}$ ) | CCL ( $\text{\AA}$ ) | Position ( $\text{\AA}^{-1}$ ) | FWHM ( $\text{\AA}^{-1}$ ) | Distance ( $\text{\AA}$ ) | CCL ( $\text{\AA}$ ) |
| PBDB-T:PYTS <sub>L</sub> | 0.281                          | 0.089                     | 22.44                     | 78.44                | 1.66                           | 0,434                      | 3.78                      | 16.08                |
| PBDB-T:PYTS <sub>M</sub> | 0.281                          | 0.085                     | 22.44                     | 82.13                | 1.68                           | 0,395                      | 3.74                      | 17.67                |
| PBDB-T:PYTS <sub>H</sub> | 0.281                          | 0.095                     | 22.44                     | 73.48                | 1.68                           | 0,319                      | 3.74                      | 21.88                |
